# Supplementary material for: Azobenzene-containing molecularly imprinted polymer microspheres with photoresponsive template binding properties
Source: Royal Society of Chemistry journal article supplement (doi:10.1039/c0jm02898c), 2010-12-17
Supplement: c0jm02898c.pdf [file c0jm02898c.pdf]

*Supporting Information*

**Azobenzene-containing molecularly imprinted polymer microspheres  
with photoresponsive template binding properties**

Liangjing Fang, Sujing Chen, Ying Zhang and Huiqi Zhang\*

*Key Laboratory of Functional Polymer Materials (Nankai University), Ministry of  
Education, Department of Chemistry, Nankai University, Tianjin 300071, P. R. China*

*E-mail: zhanghuiqi@nankai.edu.cn; Tel/Fax: +86 2223507193*

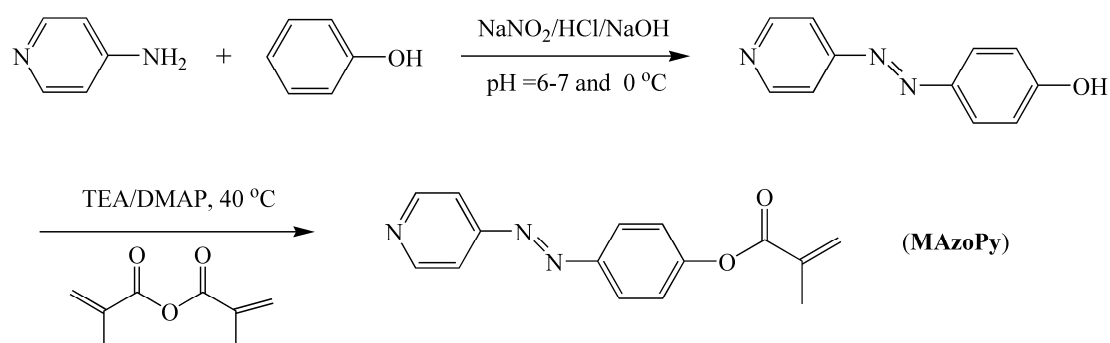

**Scheme S1** Synthetic route for the azo functional monomer MAzoPy.

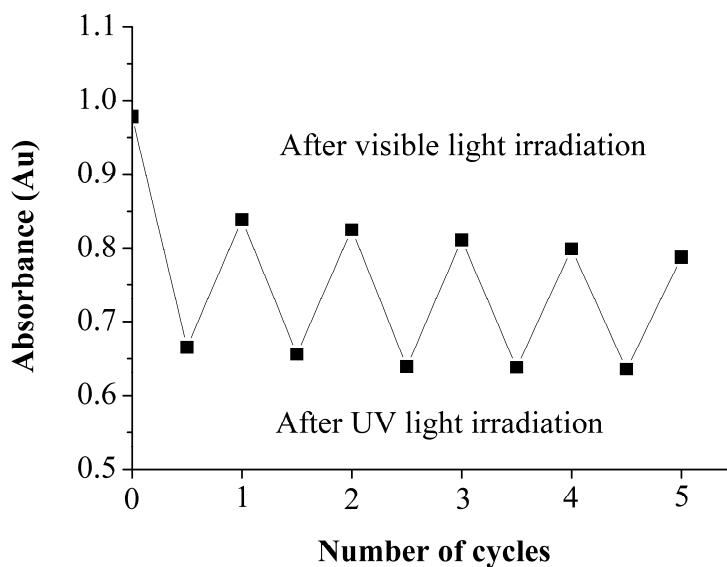

**Fig. S1** The absorbance change for the *trans*-isomer during UV and visible light-induced photoisomerization cycles of MAzoPy solution in acetonitrile ( $C = 0.05$  mM) at 25 °C. In each cycle, the azo monomer solution was irradiated firstly with UV light for 210 s and then with visible light for 50 s, respectively.

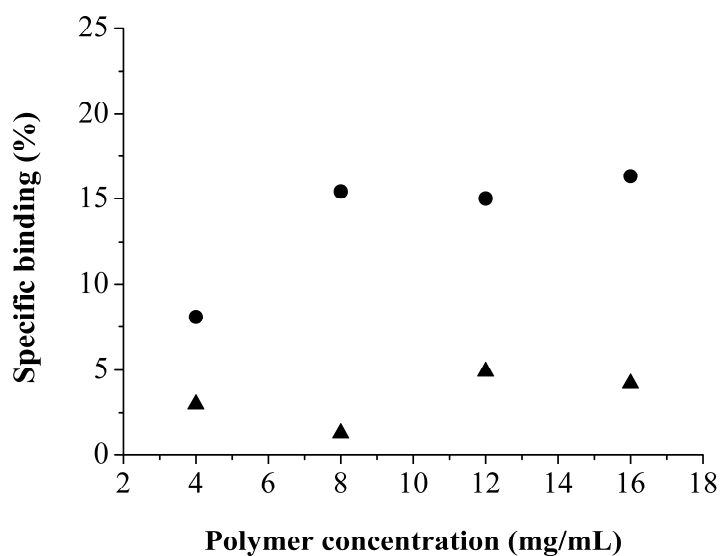

**Fig. S2** Equilibrium specific bindings of 2,4-D ( $C = 0.05$  mM) on different amounts of azo-containing MIP microspheres in the dark (circle) and under UV light irradiation (triangle), respectively.
